# Supplementary material for: Epigenetic and transcriptional dysregulation in CD4+ T cells in patients with atopic dermatitis
Source: PubMed Central journal article supplement (PMC9135339; doi:10.1371/journal.pgen.1009973), 2022-05-16

**Supplemental Figure 1. ATAC-seq and NFKB1 ChIP-seq peak pairwise normalized read count comparisons.** Each dot represents a peak that is present in either of the two samples. The X- and Y-axis indicate the number of normalized read counts for that peak in the two samples. The red line indicates peaks with similar normalized read counts between the two samples. **A.** ATAC-seq scatter plot analysis for controls. **B.** ATAC-seq scatter plot analysis for AD cases. **C.** ChIP-seq scatter plot analysis for controls. **D.** ChIP-seq scatter plot analysis for AD cases. **E.** Global Variability analysis of the ATAC and ChIP peaks across AD and controls.

**A. ATAC-seq normalized read count pairwise comparison (controls)**

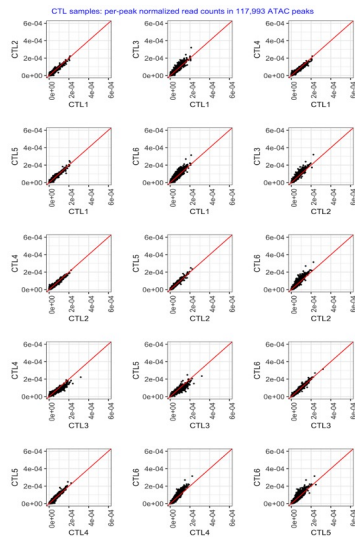

**B. ATAC-seq normalized read count pairwise comparison (cases)**

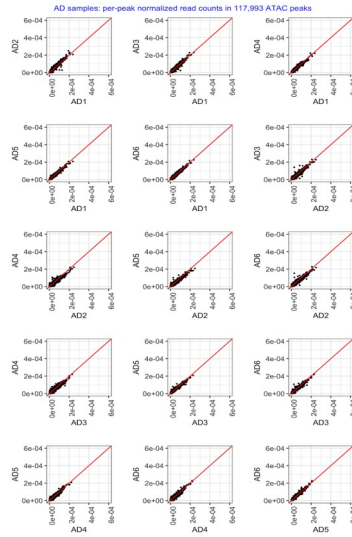

**C. ChIP-seq normalized read count pairwise comparison (controls)**

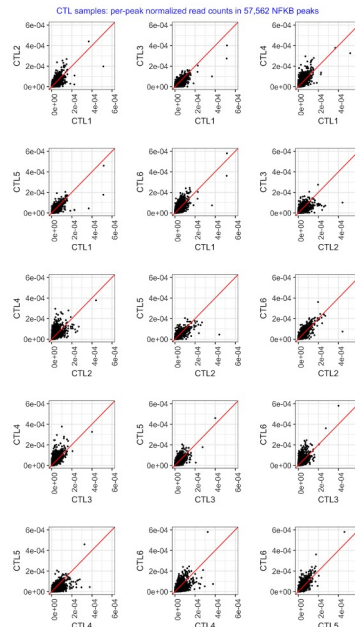

**D. ChIP-seq normalized read count pairwise comparison (cases)**

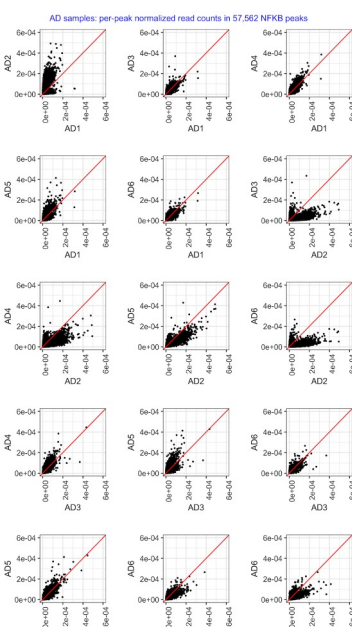

**E. Global Variability analysis**

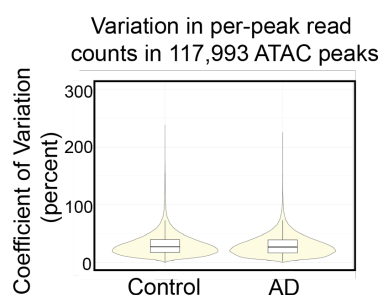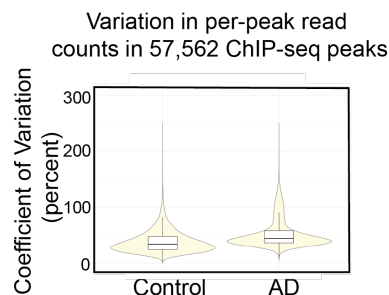

Supplement: pgen.1009973.s001.pdf [file pgen.1009973.s001.pdf]
