# Supplementary material for: Epigenetic and transcriptional dysregulation in CD4+ T cells in patients with atopic dermatitis
Source: PubMed Central journal article supplement (PMC9135339; doi:10.1371/journal.pgen.1009973), 2022-05-16

**Supplemental Figure 3: Number of consistently differential ATAC-seq and ChIP-seq peaks across sample pairs.** ATAC-seq and ChIP-seq peaks were called for all cases and controls. For each matched pair of samples, a MANorm analysis identified shared peaks, control-specific peaks and AD-specific peaks (see Methods). Bar plots indicate the distributions of the number of control-specific (left) or case-specific peaks (right) for ATAC-seq (A,B) and ChIP-seq (C,D). For example, there are approximately 10 ATAC-seq peaks in the genome that are control-specific in 4 of the 6 matched pairs (see panel A).

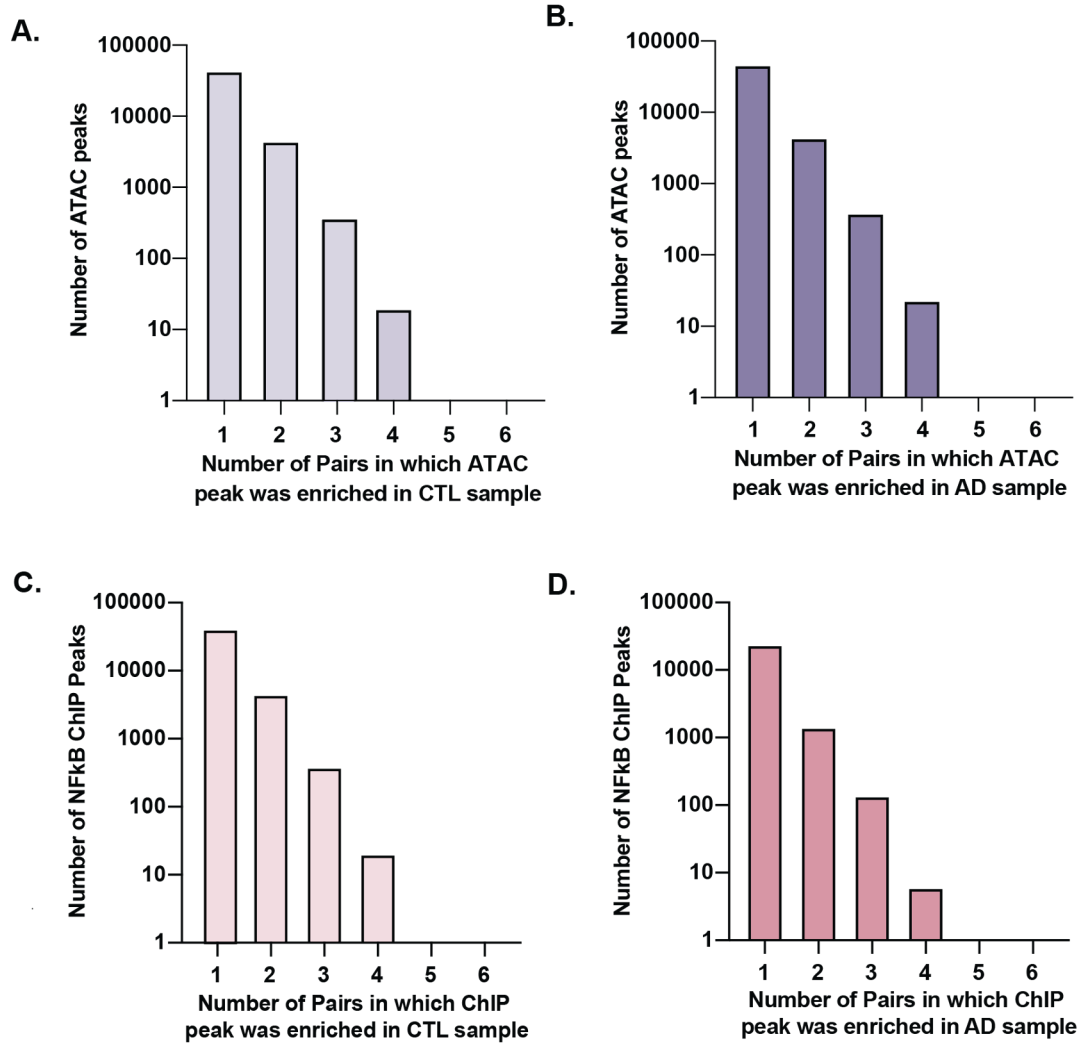

Supplement: pgen.1009973.s003.pdf [file pgen.1009973.s003.pdf]
