# Supplementary material for: Epigenetic and transcriptional dysregulation in CD4+ T cells in patients with atopic dermatitis
Source: PubMed Central journal article supplement (PMC9135339; doi:10.1371/journal.pgen.1009973), 2022-05-16

**Supplemental Figure 5: Transcription factor motif enrichment comparison between consistently control-specific and consistently AD-specific NFKB1 ChIP-seq peaks.** The top five enriched TF motif families are shown. **A.** Percent of peaks containing predicted binding sites for the indicated motif. **B.** Motif enrichment p-value within those peaks (see Methods).

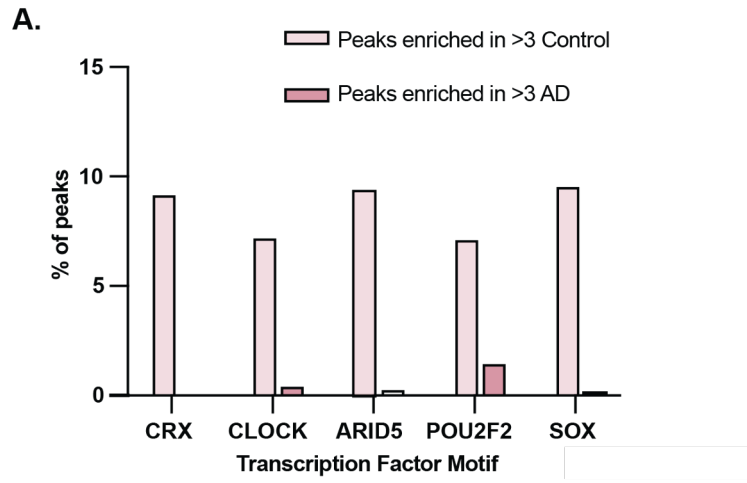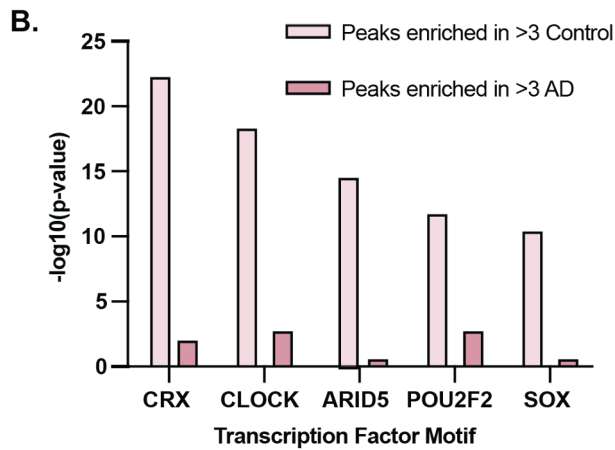

Supplement: pgen.1009973.s005.pdf [file pgen.1009973.s005.pdf]
