# Supplementary material for: Epigenetic and transcriptional dysregulation in CD4+ T cells in patients with atopic dermatitis
Source: PubMed Central journal article supplement (PMC9135339; doi:10.1371/journal.pgen.1009973), 2022-05-16
Supplement: pgen.1009973.s006.pdf [file pgen.1009973.s006.pdf]

**Supplemental Figure 6. RNA-seq GO enrichment results.** Pairwise differential gene expression analysis was performed by comparing RNA-seq data for each of the cases with their matched controls (see Methods). Genes with 1.5-fold changes or greater in three or more pairs were identified. Pathway enrichment analysis was performed on these gene sets. The top five enriched GO biological pathways and GO molecular function categories are indicated within the top and bottom tables, respectively.

**Go: Biological Pathways**

| ID         | Name                                | pValue   | FDR B&H  | Genes from Input   | Genes in Annotation  |
|------------|-------------------------------------|----------|----------|--------------------|----------------------|
| GO:0002682 | regulation of immune system process | 1.01E-10 | 2.20E-07 | <a href="#">16</a> | <a href="#">1747</a> |
| GO:0046649 | lymphocyte activation               | 9.11E-09 | 9.91E-06 | <a href="#">11</a> | <a href="#">865</a>  |
| GO:0045321 | leukocyte activation                | 1.66E-08 | 1.21E-05 | <a href="#">13</a> | <a href="#">1447</a> |
| GO:0001775 | cell activation                     | 6.54E-08 | 3.44E-05 | <a href="#">13</a> | <a href="#">1623</a> |
| GO:0019221 | cytokine-mediated signaling pathway | 7.89E-08 | 3.44E-05 | <a href="#">10</a> | <a href="#">82</a>   |

**Go: Molecular Function**

| ID         | Name                                                                | pValue   | FDR B&H  | Genes from Input  | Genes in Annotation |
|------------|---------------------------------------------------------------------|----------|----------|-------------------|---------------------|
| GO:0005126 | cytokine receptor binding                                           | 3.24E-05 | 4.88E-03 | <a href="#">5</a> | <a href="#">295</a> |
| GO:0031730 | CCR5 chemokine receptor binding                                     | 4.44E-05 | 4.88E-03 | <a href="#">2</a> | <a href="#">8</a>   |
| GO:0050998 | nitric-oxide synthase binding                                       | 5.90E-04 | 2.60E-02 | <a href="#">2</a> | <a href="#">28</a>  |
| GO:0061629 | RNA polymerase II-specific DNA-binding transcription factor binding | 6.34E-04 | 2.60E-02 | <a href="#">4</a> | <a href="#">312</a> |
| GO:0005164 | tumor necrosis factor receptor binding                              | 8.71E-04 | 2.60E-02 | <a href="#">2</a> | <a href="#">34</a>  |
